# Supplementary material for: Synthesis of NMN by cascade catalysis of intracellular multiple enzymes
Source: Royal Society of Chemistry journal article supplement (doi:10.1039/d3ra03857b), 2023-01-01
Supplement: d3ra03857b1.pdf [file d3ra03857b1.pdf]

# Supplementary materials for

## The Synthesis of NMN by Cascade Catalysis of Intracellular Multiple Enzymes

Wenfeng Hua<sup>†</sup>, Na Jiang<sup>†</sup>, Yifei Wu<sup>†</sup>, Cailian Zhou<sup>†</sup>, Kequan Chen<sup>†</sup>, Xin Wang<sup>†\*</sup>

Email: [xinwang1988@njtech.edu.cn](mailto:xinwang1988@njtech.edu.cn)

### **This PDF files include:**

Figures S1 to S3

Table S1

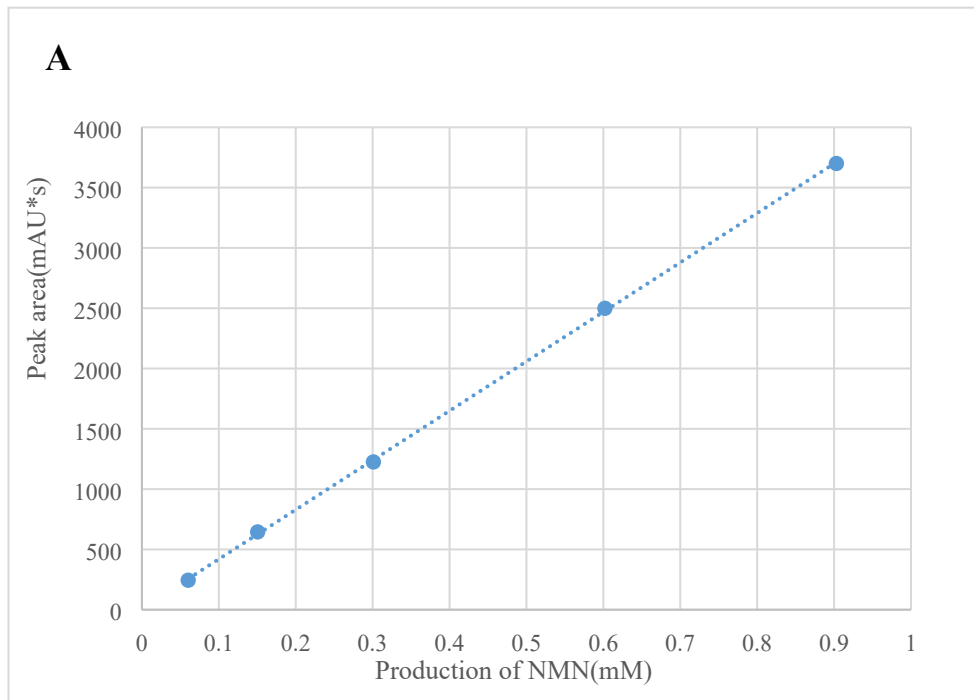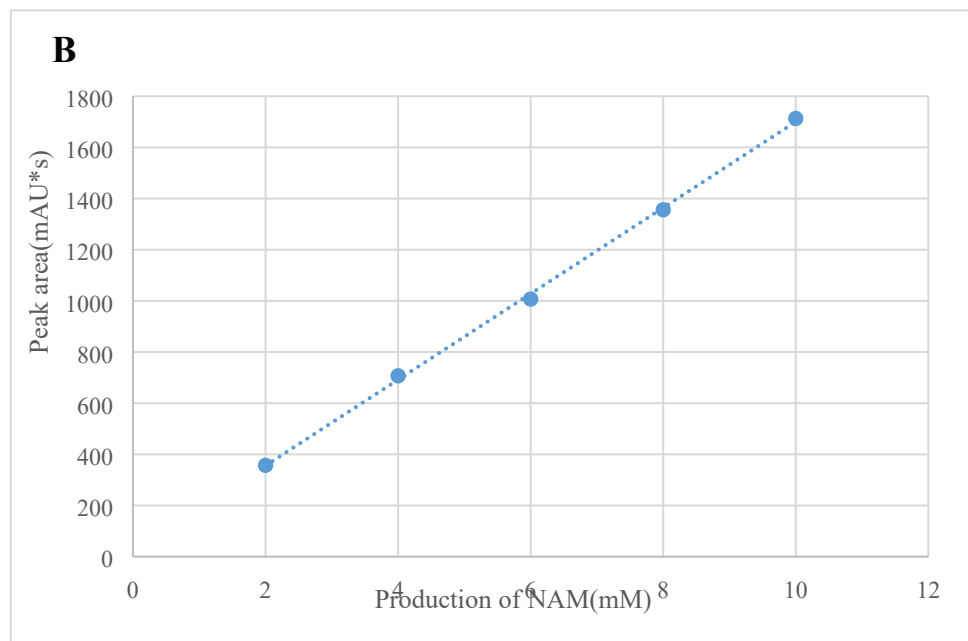

**Figure S1. The standard curve of substrates and products HPLC**

A. The standard curve of NMN HPLC ; B. The standard curve of NAM HPLC

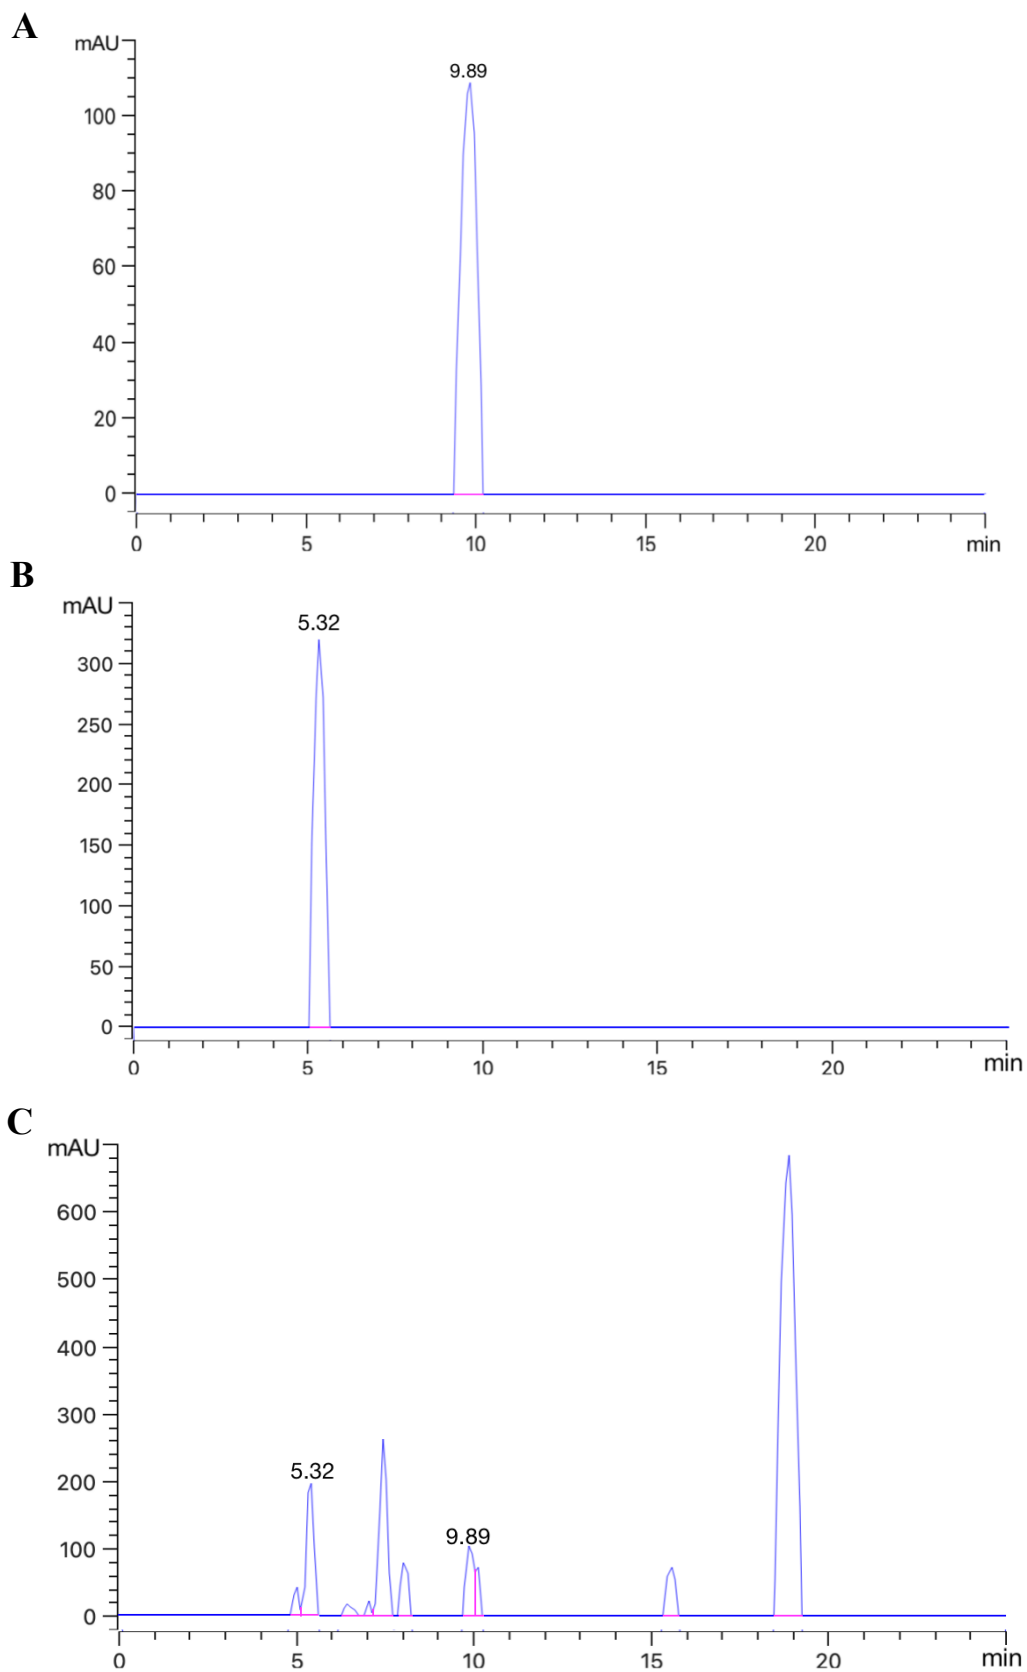

**Figure S2. Schematic diagram of HPLC results**

A. HPLC results of 8mM NAM standard sample; B. HPLC results of 0.7mM NMN standard sample; C. HPLC results of NMN production through GP pathway

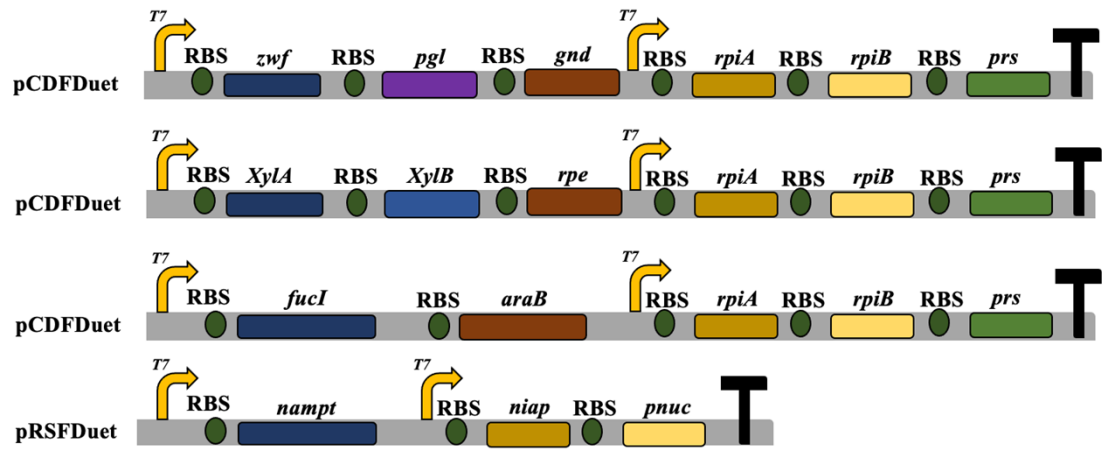

Figure S3. Schematic diagram of plasmid construction

**Supplementary Table S1.** The gene sequences used in this study

| Genes      | Sequences (5'-3')                                                                                                                                                                                                                                                                                                                                                                                                                                                                                                                                                                                                                                                                                                                                                                                                                                                                                                                                                                                                                                                                                                                                                                                                                                                                                                                                                                                                                                                                                                                                                                                                                                                                                               |
|------------|-----------------------------------------------------------------------------------------------------------------------------------------------------------------------------------------------------------------------------------------------------------------------------------------------------------------------------------------------------------------------------------------------------------------------------------------------------------------------------------------------------------------------------------------------------------------------------------------------------------------------------------------------------------------------------------------------------------------------------------------------------------------------------------------------------------------------------------------------------------------------------------------------------------------------------------------------------------------------------------------------------------------------------------------------------------------------------------------------------------------------------------------------------------------------------------------------------------------------------------------------------------------------------------------------------------------------------------------------------------------------------------------------------------------------------------------------------------------------------------------------------------------------------------------------------------------------------------------------------------------------------------------------------------------------------------------------------------------|
| <b>Zwf</b> | <p>ATGGCGGTAACGCAAACAGCCCAGGCCTGTGACCTGGTCATTTTCGGCGCG<br/> AAAGGCGACCTTGCGCGTCGTAAATTGCTGCCTTCCCTGTATCAACTGGAAA<br/> AAGCCGCTCAGCTCAACCCGGACACCCGGATTATCGGCGTAGGGCGTGCTG<br/> ACTGGGATAAAGCGGCATATACCAAAGTTGTCCGCGAGGCGCTCGAACTT<br/> TCATGAAAGAAACCATTGATGAAGGTTTATGGGACACCCTGAGTGCACGTCT<br/> GGATTTTTGTAATCTCGATGTCAATGACACTGCTGCATTCAGCCGTCTCGGC<br/> GCGATGCTGGATCAAAAAAATCGTATCACCATTA ACTACTTTGCCATGCCGC<br/> CCAGCACTTTTGGCGCAATTTGCAAAGGGCTTGGCGAGGCAAACTGAATG<br/> CTAAACCGGCACGCGTAGTCATGGAGAAACCCTGGGGACGTCGCTGGCGA<br/> CCTCGCAGGAAATCAATGATCAGGTTGGCGAATACTTCGAGGAGTGCCAGG<br/> TTTACCGTATCGACCACTATCTTGGTAAAGAAACGGTGCTGAACCTGTTGGC<br/> GCTGCGTTTTGCTAACTCCCTGTTTGTGAATAACTGGGACAATCGCACCATT<br/> GATCATGTTGAGATTACCGTGGCAGAAGAAGTGGGGATCGAAGGGCGCTGG<br/> GGCTATTTTGATAAAGCCGGTCAGATGCGCGACATGATCCAGAACCACCTGC<br/> TGCAAATCTTTGCATGATTGCGATGTCTCCGCCGTCTGACCTGAGCGCAGA<br/> CAGCATCCGCGATGAAAAAGTGAAAGTACTGAAGTCTCTGCGCCGCATCGA<br/> CCGCTCCAACGTACGCGAAAAAACCGTACGCGGGCAATATACTGCGGGCTT<br/> CGCCCAGGGCAAAAAAGTGCCGGGATATCTGGAAGAAGAGGGCGCGAACA<br/> AGAGCAGCAATACAGAACTTTCGTGGCGATCCGCGTCGACATTGATAACT<br/> GGCGCTGGGCCGGTGTGCCATTCTACCTGCGTACTGGTAAACGTCTGCCGAC<br/> CAAATGTTCTGAAGTCGTGGTCTATTTCAAACACCTGAACTGAATCTGTTT<br/> AAAGAATCGTGGCAGGATCTGCCGCAGAATAAACTGACTATCCGTCTGCAA<br/> CCTGATGAAGGCGTGGATATCCAGGTA CTGAATAAAGTTCCTGGCCTTGACC<br/> ACAAACATAACCTGCAAATCACCAAGCTGGATCTGAGCTATTCAGAAACCTT<br/> TAATCAGACGCATCTGGCGGATGCCTATGAACGTTTGCTGCTGGAAACCATG<br/> CGTGGTATTCAGGCACTGTTTGTACGTGCGGACGAAGTGGAGAAGCCTGG<br/> AAATGGGTAGACTCCATTACTGAGGCGTGGGCGATGGACAATGATGCGCCG<br/> AAACCGTATCAGGCCGGAACCTGGGGACCCGTTGCCTCGGTGGCGATGATT<br/> ACCCGTGATGGTCGTTCCCTGGAATGAGTTTGAGTAA</p> |
| <b>Pgl</b> | <p>ATGAAGCAAACAGTTTATATCGCCAGCCCTGAGAGCCAGCAAATTCACGTCT<br/> GGAATCTGAATCATGAAGGCGCACTGACGCTGACACAGGTTGTCGATGTGC<br/> CGGGGCAGGTGCAGCCGATGGTGGTCAGCCCGGACAAACGTTATCTCTATG<br/> TTGGTGTTCGCCCTGAGTTTCGCGTCCTGGCGTATCGTATCGCCCCGGACGA<br/> TGCGCACTGACCTTTGCCGCAGAGTCTGCGCTGCCGGGTAGTCCGACGCAT<br/> ATTTCCACCGATCACCAGGGCAGTTTGTCTTTGTAGGTTCTTACAATGCGG<br/> GTAACGTGAGCGTAAACGCGTCTGGAAGATGGCCTGCCAGTGGGCGTCGTCG<br/> ATGTGGTTCGAGGGGCTGGACGTTGCCATTCCGCCAATATCTCACC GGACAA<br/> CCGTACGCTGTGGGTTCCGGCATTAAAGCAGGATCGCATTTGCCTGTTTACG<br/> GTCAGCGATGATGGTCATCTCGTGGCGCAGGACCCTGCGGAAGTGACCACC<br/> GTTGAAGGGGCCCGCCCGT CATATGGTATTCCATCCAAACGAACAATAT<br/> GCGTATTGCGTCAATGAGTTAAACAGCTCAGTGGATGTCTGGGAACTGAAA</p>                                                                                                                                                                                                                                                                                                                                                                                                                                                                                                                                                                                                                                                                                                                                                                                                                                                                                                                                                                                              |

|             |                                                                                                                                                                                                                                                                                                                                                                                                                                                                                                                                                                                                                                                                                                                                                                                                                                                                                                                                                                                                                                                                                                                                                                                                                                                                                                                                                                                                                                                                                                                                                                                                                                     |
|-------------|-------------------------------------------------------------------------------------------------------------------------------------------------------------------------------------------------------------------------------------------------------------------------------------------------------------------------------------------------------------------------------------------------------------------------------------------------------------------------------------------------------------------------------------------------------------------------------------------------------------------------------------------------------------------------------------------------------------------------------------------------------------------------------------------------------------------------------------------------------------------------------------------------------------------------------------------------------------------------------------------------------------------------------------------------------------------------------------------------------------------------------------------------------------------------------------------------------------------------------------------------------------------------------------------------------------------------------------------------------------------------------------------------------------------------------------------------------------------------------------------------------------------------------------------------------------------------------------------------------------------------------------|
|             | <p>GATCCGCACGGTAATATCGAATGTGTCCAGACGCTGGATATGATGCCGGAA<br/> AACTTCTCCGACACCCGTTGGGCGGCTGATATTCATATCACCCCGGATGGTC<br/> GCCATTTATACGCCTGCGACCGTACCGCCAGCCTGATTACCGTTTTACGCGT<br/> TTCGGAAGATGGCAGCGTGTGAGTAAAGAAGGCTTCCAGCCAACGGAAAC<br/> CCAGCCGCGCGGCTTCAATGTTGATCACAGCGGCAAGTATCTGATTGCCGCC<br/> GGGCAAAAATCTCACCACATCTCGGTATACGAAATTGTTGGCGAGCAGGGG<br/> CTACTGCATGAAAAAGGCCGCTATGCGGTTCGGGCAGGGACCAATGTGGGTG<br/> GTGGTTAACGCACACTAA</p>                                                                                                                                                                                                                                                                                                                                                                                                                                                                                                                                                                                                                                                                                                                                                                                                                                                                                                                                                                                                                                                                                                                                                                                         |
| <b>Gnd</b>  | <p>ATGTCCAAGCAACAGATCGGCGTAGTCGGTATGGCAGTGATGGGACGCAAC<br/> CTTGCGCTCAACATCGAAAGCCGTGGTTATACCGTCTCTATTTTCAACCGTTC<br/> CCGTGAGAAGACGGAAGAAGTGATTGCCGAAAATCCAGGCAAGAACTGGT<br/> TCCTTACTATACGGTGAAAGAGTTTGTGCAATCTCTGGAAACGCCTCGTCGC<br/> ATCCTGTTAATGGTGAAAGCAGGTGCAGGCACGGATGCTGCTATTGATTCCC<br/> TCAAACCATATCTCGATAAAGGAGACATCATCATTGATGGTGGTAACACCTT<br/> CTTCCAGGACACTATTCGTCGTAATCGTGAGCTTTCAGCAGAGGGCTTTAAC<br/> TTCATCGGTACCGGTGTTTCTGGCGGTGAAGAGGGGGCGCTGAAAGGTCCTT<br/> CTATTATGCCTGGTGGCCAGAAAGAAGCCTATGAATTGGTAGCACCGATCCT<br/> GACCAAAATCGCCGCCGTAGCTGAAGACGGTGAACCATGCGTTACCTATATT<br/> GGTGCCGATGGCGCAGGTCACTATGTGAAGATGGTTCACAACGGTATTGAA<br/> TACGGCGATATGCAGCTGATTGCTGAAGCCTATTCTCTGCTTAAAGGTGGCC<br/> TGAACCTACCAACGAAGAAGTGGCGCAGACCTTTACCGAGTGGAATAACG<br/> GTGAACTGAGCAGTTACCTGATCGACATCACCAAAGATATCTTCACCAAAA<br/> AAGATGAAGACGGTAACTACCTGGTTGATGTGATCCTGGATGAAGCGGCTA<br/> ACAAAGGTACCGGTAAATGGACCAGCCAGAGCGCGCTGGATCTCGGCGAAC<br/> CGCTGTGCTGATTACCGAGTCTGTGTTTGCACGTTATATCTTCTCTGAAA<br/> GATCAGCGTGTGCCGCATCTAAAGTTCTCTCTGGTCCGCAAGCACAGCCAG<br/> CAGGCGACAAGGCTGAGTTCATCGAAAAAGTTCGTCGTGCGCTGTATCTGG<br/> GCAAAAATCGTTTCTTACGCCAGGGCTTCTCTCAGCTGCGTGCTGCGTCTGA<br/> AGAGTACAACCTGGGATCTGAACTACGGCGAAATCGCGAAGATTTTCCGTGC<br/> TGGCTGCATCATCCGTGCGCAGTTCCTGCAGAAAATCACCGATGCTTATGCC<br/> GAAAATCCACAGATCGCTAACCTGTTGCTGGCTCCGTACTTCAAGCAAATTG<br/> CCGATGACTACCAGCAGGCGCTGCGTGATGTCGTTGCTTATGCAGTACAGAA<br/> CGGTATTCCGGTTCGGACCTTCTCCGCAGCGGTTGCCTATTACGACAGCTAC<br/> CGTGCTGCTGTTCTGCCTGCGAACCTGATCCAGGCACAGCGTACTATTTTG<br/> GTGCGCATACTTATAAGCGTATTGATAAAGAAGGTGTGTTCCATAACCGAATG<br/> GCTGGATTAA</p> |
| <b>RpiA</b> | <p>ATGACGCAGGATGAATTGAAAAAAGCAGTAGGATGGGCGGCACCTTCAGTAT<br/> GTTACGCCCGGCACCATTGTTGGTGTAGGTACAGGTTCCACCGCCGCACACT<br/> TTATTGACGCGCTCGGTACAATGAAAGGCCAGATTGAAGGGGCGGTTTCCA<br/> GTTACAGATGCTTCCACTGAAAAACTGAAAAGCCTCGGCATTCACGTTTTTGA<br/> TCTCAACGAAGTCGACAGCCTTGGCATCTACGTTGATGGCGCAGATGAAATC<br/> AACGGCCACATGCAAATGATCAAAGGCGGCGGCGGCGCTGACCCGTGAA<br/> AAAATCATTGCTTCGGTTGCAGAAAAATTTATCTGTATTGCAGACGCTTCCA<br/> AGCAGGTTGATATTCTGGGTAAATTCCCGCTGCCAGTAGAAGTTATCCCGAT</p>                                                                                                                                                                                                                                                                                                                                                                                                                                                                                                                                                                                                                                                                                                                                                                                                                                                                                                                                                                                                                                                                                                                                                      |

|             |                                                                                                                                                                                                                                                                                                                                                                                                                                                                                                                                                                                                                                                                                                                                                                                                                                                                                                                                                                                                                                                         |
|-------------|---------------------------------------------------------------------------------------------------------------------------------------------------------------------------------------------------------------------------------------------------------------------------------------------------------------------------------------------------------------------------------------------------------------------------------------------------------------------------------------------------------------------------------------------------------------------------------------------------------------------------------------------------------------------------------------------------------------------------------------------------------------------------------------------------------------------------------------------------------------------------------------------------------------------------------------------------------------------------------------------------------------------------------------------------------|
|             | GGCACGTAGTGCAGTGGCGCGTCAGCTGGTGAAACTGGGCGGTTCGTCCGGA<br>ATACCGTCAGGGCGTGGTGACCGATAATGGCAACGTGATCCTCGACGTCCA<br>CGGCATGAAAATCCTTGACCCGATAGCGATGGAAAACGCCATAAATGCGAT<br>TCCTGGCGTGGTGACTGTTGGCTTGTGGCTAACCCTGGCGCGGACGTTGCG<br>CTGATTGGCACACCTGACGGTGTCAAACCATTGTGAAATGA                                                                                                                                                                                                                                                                                                                                                                                                                                                                                                                                                                                                                                                                                                                                                                                  |
| <b>RpiB</b> | ATGAAAAAGATTGCATTTGGCTGTGATCATGTCCGGTTTCATTTTAAAACATG<br>AAATAGTGGCACATTTAGTTGAGCGTGGCGTTGAAGTGATTGATAAAGGAA<br>CCTGGTCGTCAGAGCGTACTGATTATCCACATTACGCCAGTCAAGTCGCACT<br>GGCTGTTGCTGGCGGAGAGGTTGATGGCGGGATTTTGATTTGTGGTACTGGC<br>GTCGGTATTTTCGATAGCGGCGAACAAGTTTGGCCGGAATTCGCGCGGTTCGTCT<br>GTAGCGAACCTTATTCCGCGCAACTTTCGCGGCAGCATAACGACACCAACGT<br>GCTGGCTTTTGGTTCACGAGTGGTTGGCCTCGAACTGGCAAAAATGATTGTG<br>GATGCGTGGCTGGGCGCACAGTACGAAGGCGGTTCGTCATCAACAACGCGTG<br>GAGGCGATTACGGCAATAGAGCAGCGGAGAAATTGA                                                                                                                                                                                                                                                                                                                                                                                                                                                                                                                                                 |
| <b>Prs</b>  | GTGCCTGATATGAAGCTTTTTGCTGGTAACGCCACCCCGGAACTAGCACAAC<br>GTATTGCCAACCGCCTGTACACTTACTCGGCGACCCGCTGTAGGTCGCTT<br>TAGCGATGGCGAAGTCAGCGTACAAATTAATGAAAATGTACGCGGTGGTGA<br>TATTTTCATCATCCAGTCCACTTGTGCCCTACTAACGACAACCTGATGGAA<br>TTAGTCGTTATGGTTGATGCCCTGCGTCGTGCTTCCGCAGGTCGATACCCGC<br>TGTTATCCCCTACTTTGGCTATGCGCGCCAGGACCGTCGCGTCCGTTCCGCTC<br>GTGTACCAATCACTGCGAAAGTGGTTGCAGACTTCCCTCTCCAGCGTCGGTGT<br>TGACCGTGTGCTGACAGTGGATCTGCACGCTGAACAGATTCAGGGTTTCTTC<br>GACGTTCCGGTTGATAACGTATTTGGTAGCCCGATCCTGCTGGAAGACATGC<br>TGCAGCTGAATCTGGATAACCCAATTGTGGTTTCTCCGGACATCGGCGGCGT<br>TGTGCGTGCCCGCGCTATCGCTAAGCTGCTGAACGATACCGATATGGCAATC<br>ATCGACAAACGTTCGTCGCGTGCGAACGTTTCACAGGTGATGCATATCATCG<br>GTGACGTTGCAGGTCGTGACTGCGTACTGGTCGATGATATGATCGACACTGG<br>CGGTACGCTGTGTAAAGCTGCTGAAGCTCTGAAAGAACGTGGTGCTAAACG<br>TGTATTTGCGTACGCGACTACCCGATCTTCTCTGGCAACGCGGCGAACAAC<br>CTGCGTAACTCTGTAATTGATGAAGTCGTTGTCTGCGATACCATTCCGCTGA<br>GCGATGAAATCAAATCACTGCCGAACGTGCGTACTCTGACCCTGTCAGGTAT<br>GCTGGCCGAAGCGATTCGTCGATCAGCAACGAAGAATCGATCTCTGCCATG<br>TTCGAACACTAA |
| <b>XylA</b> | ATGCAAGCCTATTTTGACCAGCTCGATCGCGTTCGTTATGAAGGCTCAAAT<br>CCTCAAACCCGTTAGCATTCCGTCACTACAATCCCGACGAACTGGTGTGGG<br>TAAGCGTATGGAAGAGCACTTGCGTTTTGCCGCCTGCTACTGGCACACCTC<br>TGCTGGAACGGGGCGGATATGTTTGGTGTGGGGGCGTTAATCGTCCGTGGC<br>AGCAGCCTGGTGAGGCACTGGCGTTGGCGAAGCGTAAAGCAGATGTCGCAT<br>TTGAGTTTTTCCACAAGTTACATGTGCCATTTTATTGCTTCCACGATGTGGAT<br>GTTTCCCCTGAGGGCGCGTCGTTAAAAGAGTACATCAATAATTTTGCGAAA<br>TGGTTGATGTCTGGCAGGCAAGCAAGAAGAGAGCGGCGTGAAGCTGCTGT<br>GGGGAACGGCCAACTGCTTTACAAACCCTCGCTACGGCGCGGGTGC GGCGA<br>CGAACCCAGATCCTGAAGTCTTACGCTGGGCGGCAACGCAAGTTGTTACAG<br>CGATGGAAGCAACCCATAAATTGGGCGGTGAAAACCTATGTCCTGTGGGGCG                                                                                                                                                                                                                                                                                                                                                                                                                            |

|             |                                                                                                                                                                                                                                                                                                                                                                                                                                                                                                                                                                                                                                                                                                                                                                                                                                                                                                                                                                                                                                                                                                                                                                                                                                                                                                                                                                                                                                                                                                                                                                                                                                                                                           |
|-------------|-------------------------------------------------------------------------------------------------------------------------------------------------------------------------------------------------------------------------------------------------------------------------------------------------------------------------------------------------------------------------------------------------------------------------------------------------------------------------------------------------------------------------------------------------------------------------------------------------------------------------------------------------------------------------------------------------------------------------------------------------------------------------------------------------------------------------------------------------------------------------------------------------------------------------------------------------------------------------------------------------------------------------------------------------------------------------------------------------------------------------------------------------------------------------------------------------------------------------------------------------------------------------------------------------------------------------------------------------------------------------------------------------------------------------------------------------------------------------------------------------------------------------------------------------------------------------------------------------------------------------------------------------------------------------------------------|
|             | <p>GTCGTGAAGGTTACGAAACGCTGTTAAATACCGACTTGCGTCAGGAGCGTG<br/> AACAACTGGGCCGCTTTATGCAGATGGTGGTTGAGCATAAACATAAAATCG<br/> GTTTCCAGGGCACGTTGCTTATCGAACCGAAACCGCAAGAACCGACCAAAC<br/> ATCAATATGATTACGATGCCGCGACGGTCTATGGCTTCCTGAAACAGTTTGG<br/> TCTGGAAAAAGAGATTAACTGAACATTGAAGCTAACCACGCGACGCTGGC<br/> AGGTCACTCTTCCATCATGAAATAGCCACCGCCATTGCGCTTGGCCTGTT<br/> GGTTCTGTCGACGCCAACCGTGGCGATGCGCAACTGGGCTGGGACACCGAC<br/> CAGTTCCCGAACAGTGTGGAAGAGAATGCGCTGGTGTATGAAATTCTC<br/> AAAGCAGGCGGTTTACCACCGGTGGTCTGAACTTCGATGCCAAAGTACGTC<br/> GTCAAAGTACTGATAAATATGATCTGTTTTACGGTCATATCGGCGCGATGGA<br/> TACGATGGCACTGGCGCTGAAAATTGCAGCGCGCATGATTGAAGATGGCGA<br/> GCTGGATAAACGCATCGCGCAGCGTTATTCCGGCTGGAATAGCGAATTGGG<br/> CCAGCAAATCCTGAAAGGCCAAATGTCACTGGCAGATTTAGCCAAATATGC<br/> TCAGGAACATCATTGTCTCCGGTGCATCAGAGTGGTCGCCAGGAACAACG<br/> GAAAATCTGGTAAACCATTATCTGTTTCGACAAATAA</p>                                                                                                                                                                                                                                                                                                                                                                                                                                                                                                                                                                                                                                                                                                                                                                                                                    |
| <b>XylB</b> | <p>ATGTATATCGGGATAGATCTTGGCACCTCGGGCGTAAAAGTTATTTTGCTCA<br/> ACGAGCAGGGTGAGGTGGTTGCTGCGCAAACGGAAAAGCTGACCGTTTCGC<br/> GCCCCGATCCACTCTGGTCGGAACAAGACCCGGAACAGTGGTGGCAGGCAA<br/> CTGATCGCGCAATGAAAGCTCTGGGCGATCAGCATTCTCTGCAGGACGTTAA<br/> AGCATTGGGTATTGCCGGCCAGATGCACGGAGCAACCTTGCTGGATGCTCA<br/> GCAACGGGTGTTACGCCCTGCCATTTTGTGGAACGACGGGCGCTGTGCGCAA<br/> GAGTGCACCTTTGCTGGAAGCGCGAGTTCCGCAATCGCGGGTGATTACCGGC<br/> AACCTGATGATGCCCGGATTTACTGCGCCTAAATTGCTATGGGTTACGCGGC<br/> ATGAGCCGGAGATATCCGTCAAATCGACAAAGTATTATTACCGAAAGATT<br/> ACTTGCGTCTGCGTATGACGGGGGAGTTTGCCAGCGATATGTCTGACGCAGC<br/> TGGCACCATGTGGCTGGATGTGCGAAAGCGTGACTGGAGTGACGTCATGCT<br/> GCAGGCTTGCGACTTATCTCGTGACCAGATGCCCCGATTATACGAAGGCAGC<br/> GAAATTACTGGTGCTTTGTTACCTGAAGTTGCGAAAGCGTGGGGTATGGCGA<br/> CGGTGCCAGTTGTCGCAGGCGGTGGCGACAATGCAGCTGGTGCAGTTGGTG<br/> TGGGAATGGTTGATGCTAATCAGGCAATGTTATCGCTGGGGACGTCGGGGG<br/> TCTATTTTGTGTCAGCGAAGGGTTCTTAAGCAAGCCAGAAAGCGCCGTACA<br/> TAGCTTTTGCCATGCGCTACCGCAACGTTGGCATTTAATGTCTGTGATGCTG<br/> AGTGCAGCGTCGTGTCTGGATTGGGCCGCGAAATTAACCGGCCTGAGCAAT<br/> GTCCCAGCTTTAATCGCTGCAGCTCAACAGGCTGATGAAAGTGCCGAGCCA<br/> GTTTGGTTTCTGCCTTATCTTTCCGGCGAGCGTACGCCACACAATAATCCCCA<br/> GGCGAAGGGGGTTTTCTTTGGTTTACTCATCAACATGGCCCCAATGAACTG<br/> GCGCGAGCAGTGTGGAAGGCGTGGGTTATGCGCTGGCAGATGGCATGGAT<br/> GTCGTGCATGCCCTGCGGTATTAACCGCAAAGTGTTACGTTGATTGGGGGCG<br/> GGGCGCGTAGTGAGTACTGGCGTCAGATGCTGGCGGATATCAGCGGTCAGC<br/> AGCTCGATTACCGTACGGGGGGGATGTGGGGCCAGCACTGGGCGCAGCAA<br/> GGCTGGCGCAGATCGCGGCGAATCCAGAGAAATCGCTCATTGAATTGTTGC<br/> CGCAACTACCGTTAGAACAGTCGCATCTACCAGATGCGCAGCGTTATGCCGC<br/> TTATCAGCCACGACGAGAAACGTTCCGTCGCTCTATCAGCAACTTCTGCCA<br/> TTAATGGCGTAA</p> |



|             |                                                                                                                                                                                                                                                                                                                                                                                                                                                                                                                                                                                                                                                                                                                                                                                                                                                                                                                                                                                                                                                                                                                                                                                                                                                                                                                                                                                                                                                                                                                                                                                                                                                                                                                                                                                          |
|-------------|------------------------------------------------------------------------------------------------------------------------------------------------------------------------------------------------------------------------------------------------------------------------------------------------------------------------------------------------------------------------------------------------------------------------------------------------------------------------------------------------------------------------------------------------------------------------------------------------------------------------------------------------------------------------------------------------------------------------------------------------------------------------------------------------------------------------------------------------------------------------------------------------------------------------------------------------------------------------------------------------------------------------------------------------------------------------------------------------------------------------------------------------------------------------------------------------------------------------------------------------------------------------------------------------------------------------------------------------------------------------------------------------------------------------------------------------------------------------------------------------------------------------------------------------------------------------------------------------------------------------------------------------------------------------------------------------------------------------------------------------------------------------------------------|
| <b>Rpe</b>  | <p>ATGAAACAGTATTTGATTGCCCCCTCAATTCTGTGCGGCTGATTTTGCCCCGCT<br/> GGGTGAAGATACCGCAAAGCCCTGGCAGCTGGCGCTGATGTGCTGCATTTT<br/> GACGTCATGGATAACCACTATGTTCCCAATCTGACGATTGGGCCAATGGTGC<br/> TGAAATCCTTGCGTAACTATGGCATTACCGCCCCTATCGACGTACACCTGAT<br/> GGTGAAACCCGTCGATCGCATTGTGCCTGATTTGCTGCGGCTGGTGCCAGC<br/> ATCATTACCTTTCATCCAGAAGCCTCCGAGCATGTTGACCGCACGCTGCAAC<br/> TGATTAAGAAAATGGCTGTAAAGCGGGTCTGGTATTTAACCCGGCGACAC<br/> CTCTGAGCTATCTGGATTACGTGATGGATAAGCTGGATGTGATCCTGCTGAT<br/> GTCCGTCAACCCTGGTTTCGGCGGTGAGTCTTTCATTCCTCAAACACTGGAT<br/> AACTGCGCGAAGTACGTCGCCGTATCGACGAGTCTGGCTTTGACATTCGAC<br/> TAGAAGTGGACGGTGGCGTGAAGGTGAACAACATTGGCGAAATCGCTGCGG<br/> CGGGCGCGGATATGTTTCGTGCGCGGTTTCGGCAATCTTCGACCAGCCAGACTA<br/> CAAAAAAGTCATTGATGAAATGCGCAGTGAACCTGGCAAAGGTAAGTCATGA<br/> ATAA</p>                                                                                                                                                                                                                                                                                                                                                                                                                                                                                                                                                                                                                                                                                                                                                                                                                                                                                                                                                                                              |
| <b>Fucl</b> | <p>ATGAAAAAATCAGCTTACCGAAAATTGGTATCCGCCCCGTTATTGACGGTC<br/> GTCGCATGGGTGTTTCGTGAGTCGCTTGAAGAACAACAATGAATATGGCGA<br/> AAGCTACGGCCGCACTGCTGACCGAGAACTGCGCCATGCCTGCGGAGCTG<br/> CCGTCGAGTGTGTCATTTCCGATACCTGTATCGCGGGTATGGCTGAAGCCGC<br/> TGCTTGCGAAGAAAAATTCAGCAGTCAGAATGTAGGCCTCACCATTACGGT<br/> AACGCCTTGCTGGTGCTATGGCAGTGAAACCATCGACATGGATCCAACCCGC<br/> CCGAAGGCCATTTGGGGCTTTAACGGCACTGAACGCCCCGGCGCTGTTTACC<br/> TGGCAGCGGCTCTGGCAGCTCACAGCCAGAAAGGCATCCCAGCATTCTCCAT<br/> TTACGGTCATGACGTTTCCAGGATGCCGATGACACATCGATTCTGCCGATGTT<br/> GAAGAAAACTGCTGCGCTTTGCCCGCGCCGTTTGGCCGTCGCCAGCATGA<br/> AAGGTAAGCTATCTGTCGCTGGGCGGCGTTTCGATGGGTATCGCCGGTTC<br/> CATTGTTGATCACAACCTTCTTGAATCCTGGCTGGGAATGAAAGTCCAGGCG<br/> GTGGATATGACCGAACTGCGTCGCCGTATCGATCAGAAGATTTACGACGAA<br/> GCCGAATTGGAAATGGCACTGGCCTGGGCTGATAAAAACTTCCGCTATGGC<br/> GAAGATGAAAATAACAAACAGTATCAACGTAATGCCGAGCAAAGCCGCGCA<br/> GTTCTGCGCGAAAGTTTACTGATGGCGATGTGTATCCGCGACATGATGCAAG<br/> GCAACAGCAAACCTGGCCGATATTGGTCGCGTGGAAGAATCACTTGGCTACA<br/> ACGCCATCGCTGCGGGCTTCCAGGGGCAACGTCCTGGACCGATCAATATCC<br/> CAATGGTGACACCGCCGAAGCGATCCTCAACAGTTCATTTGACTGGAATGGC<br/> GTGCGCGAACCCTTTGTCGTGGCGACCGAAAACGACAGTCTTAACGGCGTG<br/> GCAATGCTAATGGGTCACCAGCTCACCGGCACCGCTCAGGTATTTGCCGATG<br/> TGCGTACCTACTGGTCACCAGAAGCAATTGAGCGTGTAACGGGGCATAAAC<br/> TGGATGGACTGGCAGAACACGGCATCATCCATTTGATCAACTCCGGTTCTGC<br/> TGCGCTGGACGGTTCTGTAAACAACGCGACAGCGAAGGTAACCCGACGAT<br/> GAAGCCACACTGGGAAATCTCTCAGCAAGAGGCTGACGCTTGCTCGCCGC<br/> TACCGAATGGTGCCCGGCGATCCACGAATACTTCCGTGGCGGCGGTTACTCT<br/> TCCCGCTTCTTACCGAAGGCGGCGTCCCGTTACCATGACTCGTGTCAACA<br/> TCATCAAAGGCCTGGGACCGGTAAGTCAAAATCGCGGAAGGCTGGAGCGTGG<br/> AATTGCCGAAGGATGTGCATGACATCCTCAACAAACGCACCAACTCAACCT<br/> GGCCAACCACCTGGTTTGCACCGCGCCTCACCAGTAAAGGGCCGTTTACGGA</p> |

|             |                                                                                                                                                                                                                                                                                                                                                                                                                                                                                                                                                                                                                                                                                                                                                                                                                                                                                                                                                                                                                                                                                                                                                                                                                                                                                                                                                                                                                                                                                                                                                                                                                                                                                                                                                                                                                                                                                                                                                                           |
|-------------|---------------------------------------------------------------------------------------------------------------------------------------------------------------------------------------------------------------------------------------------------------------------------------------------------------------------------------------------------------------------------------------------------------------------------------------------------------------------------------------------------------------------------------------------------------------------------------------------------------------------------------------------------------------------------------------------------------------------------------------------------------------------------------------------------------------------------------------------------------------------------------------------------------------------------------------------------------------------------------------------------------------------------------------------------------------------------------------------------------------------------------------------------------------------------------------------------------------------------------------------------------------------------------------------------------------------------------------------------------------------------------------------------------------------------------------------------------------------------------------------------------------------------------------------------------------------------------------------------------------------------------------------------------------------------------------------------------------------------------------------------------------------------------------------------------------------------------------------------------------------------------------------------------------------------------------------------------------------------|
|             | <p>TGTGTACTCGGTAATGGCGAACTGGGGCGCTAACCATGGGGTCTGACCATC<br/> GGCCACGTTGGCGCAGACTTTATCACTCTCGCCTCCATGCTGCGTATCCCGG<br/> TATGTATGCACAACGTTGAAGAGACCAAAGTGTATCGTCTTCTGCCTGGGC<br/> TGCGCACGGCATGGATATTGAAGGCCAGGATTACCGCGCTTGCCAGAATA<br/> CGGTCCGTTGTACAAGCGTTAA</p>                                                                                                                                                                                                                                                                                                                                                                                                                                                                                                                                                                                                                                                                                                                                                                                                                                                                                                                                                                                                                                                                                                                                                                                                                                                                                                                                                                                                                                                                                                                                                                                                                                                                                                         |
| <b>AraB</b> | <p>ATGGCGATTGCAATTGGCCTCGATTTTGGCAGTGATTCTGTGCGAGCTTTGG<br/> CGGTGGACTGCGCTACCGGTGAAGAGATCGCCACCAGCGTAGAGTGGTATC<br/> CCCGTTGGCAGAAAGGGCAATTTTGTGATGCCCCGAATAACCAGTTCGGTCA<br/> TCATCCGCGTGACTACATTGAGTCAATGGAAGCGGCACTGAAAACCGTGCTT<br/> GCAGAGCTTAGCGTCGAACAGCGCGCAGCTGTGGTCGGGATTGGCGTTGAC<br/> AGTACCGGCTCGACGCCCGCACCGATTGATGCCGACGGAAACGTGCTGGCG<br/> CTGCGCCCGGAGTTTGCCGAAAACCCGAACGCGATGTTTCGTATTGTGAAA<br/> GACCACACTGCGGTTGAAGAAGCGGAAGAGATTACCCGTTTGTGCCACGCG<br/> CCGGGCAACGTTGACTACTCCCGCTACATTGGTGGTATTTATTCCAGCGAAT<br/> GGTTCTGGGCAAAAATCCTGCATGTGACTCGCCAGGACAGCGCCGTGGCGC<br/> AATCTGCCGCATCGTGGATTGAGCTGTGCGACTGGGTGCCAGCTCTGCTTTC<br/> CGGTACCACCCGCCCGCAGGATATTCGTCGCGGACGTTGCAGCGCCGGGCA<br/> TAAATCTCTGTGGCACGAAAGCTGGGGCGGCCTGCCGCCAGCCAGTTTCTTT<br/> GATGAGCTGGACCCGATCCTCAATCGCCATTTGCCTTCCCCGCTGTTCACTG<br/> ACACTTGGACTGCCGATATTCGGTGGGCACCTTATGCCCGGAATGGGCGCA<br/> GCGTCTCGGCCTGCCTGAAAGCGTGGTGATTTCCGGCGGCGCGTTTGACTGC<br/> CATATGGGCGCAGTTGGCGCAGGCGCACAGCCTAACGCACTGGTAAAAGTT<br/> ATCGGTACTTCCACCTGCGACATTCTGATTGCCGACAAACAGAGCGTTGGCG<br/> AGCGGGCAGTTAAAGGTATTTGCGGTCAGGTTGATGGCAGCGTGGTGCCTG<br/> GATTTATCGGTCTGGAAGCAGGCCAATCGGCGTTTGGTGATATCTACGCCTG<br/> GTTTGGTCGCGTACTCGGCTGGCCGCTGGAACAGCTTGCCGCCCAGCATCCG<br/> GAACTGAAAACGCAAATCAACGCCAGCCAGAAACAACCTGCTTCCGGCGCTG<br/> ACCGAAGCATGGGCCAAAATCCGTCTCTGGATCACCTGCCGGTGGTGTCTCG<br/> ACTGGTTTAAACGGCCCGCCGACACCGAACGCTAACCAACGCCTGAAAGGGG<br/> TGATTACCGATCTTAACCTCGCTACCGACGCTCCGCTGCTGTTCCGGCGGTTT<br/> ATTGCTGCCACCGCCTTTGGCGCACGCGCAATCATGGAGTGCTTTACCGATC<br/> AGGGGATCGCCGTTAATAACGTGATGGCACTGGGCGGCATCGCGCGGAAAA<br/> ACCAGGTCATTATGCAGGCCTGCTGCGACGTGCTGAATCGCCCGCTGCAAAT<br/> TGTTGCCTCTGACCAGTGCTGTGCGCTCGGTGCGGCGATTTTTGCTGCCGTCG<br/> CCGCGAAAGTGACGCAGACATCCCATCAGCTCAGCAAAAAATGGCCAGTG<br/> CGGTAGAGAAAACCTGCAACCGTGCAGCGAGCAGGCACAACGCTTTGAAC<br/> AGCTTTATCGCCGCTATCAGCAATGGGCGATGAGCGCCGAACAACACTATCT<br/> TCCAACCTCCGCCCGGCACAGGCTGCCAGGCCGTTGCGACTCTATAA</p> |
| <b>Niap</b> | <p>ATGCCAGCAGCAACCGCACCTGCAAGTGCAGCAGCACGTCTGGAACGTCTG<br/> CCATTTTCCGTTATCATAAACGTATTTTTTTTATCATCGCAATCGCCTTTTTT<br/> TTTGATTCCGTTGATCTGGGTACCATGACCTTTGTTCTGGGTAGTATTCGTAA<br/> AGAATTTGGTCTGAGCACCGCAGCCGACAGGTCTGGTTGCAAGTCAAGTTTT<br/> TTTGGTATGGTTCTGGGTGCAGCAGTTGCAGGTCTGCTGGCAGATCGTTTTG<br/> GTCGCCGTCCTGTGTTTCAGTGAGTATGGTTCTGTGGGGTGCGGCAAGTTA</p>                                                                                                                                                                                                                                                                                                                                                                                                                                                                                                                                                                                                                                                                                                                                                                                                                                                                                                                                                                                                                                                                                                                                                                                                                                                                                                                                                                                                                                                                                                                                                                                                             |

|              |                                                                                                                                                                                                                                                                                                                                                                                                                                                                                                                                                                                                                                                                                                                                                                                                                                                                                                                                                                                                                                                                                                                                                                                                                                                                                                                        |
|--------------|------------------------------------------------------------------------------------------------------------------------------------------------------------------------------------------------------------------------------------------------------------------------------------------------------------------------------------------------------------------------------------------------------------------------------------------------------------------------------------------------------------------------------------------------------------------------------------------------------------------------------------------------------------------------------------------------------------------------------------------------------------------------------------------------------------------------------------------------------------------------------------------------------------------------------------------------------------------------------------------------------------------------------------------------------------------------------------------------------------------------------------------------------------------------------------------------------------------------------------------------------------------------------------------------------------------------|
|              | <p>TCTGTGTAGTACGGCCCAGAGCGTTGATGCACTGATTGTTTATCGTGTCTGCTGC<br/> TGGGTATTGGTATGGGTATGGAATTTCCGGTTGCGCAGACCCTGCTGTCTGA<br/> ATTTGTTCCGACCGAAAAACGTGGTCGTCTGATTGCTCTGATGGATGGTTTTT<br/> GGCCTCTGGGTTTTATTACAGCAGGTATTGTTGCATATTTTGTCTGCCGCAG<br/> TTTGGTTGGCGTACCGTTTTTGCCTGCTGGCTATTCCTGCCGTTTTTGTCTG<br/> GTTGTTTCGTCGTATTGTTCCGGAAAGCCCTCGTTGGCTGGAACATGCTGGTC<br/> GTCATGCAGAAGCCGATACTGTTATGCATACCATTGAAGCTAAAGTTATGCG<br/> TAGTGCAGGTGTTACGACCCTGCCTCCTCCTAGTCGTCTGGCAGAACCTGCA<br/> GCAGCACGCGGTTCGTGGTGCCTGCTGAAATTTGGTCCGGTGTATATCGTC<br/> GTCGTACCGTTATGGTTTGGCTGCTGTGGTTTTTTGCCCTGCTGGGTTTTTAT<br/> GGTCTGACCAGTTGGCTGGGTGCGCTGCTGCAGCAGGCAGGTTTTGAAGTTA<br/> CTAAAAGTGTTTTTTATAACAGTTCTGATCAGCCTGGGTGGTGTTCGGGTTTT<br/> CTGTGTGCCGCTTGGCTGGTTGAACGTTGGGGTCGTAACCTACCTGTATTG<br/> CGTCTCTGATTGGCGGTGGTGAATGGCTTATGCATATGGTCAGTCTGCGCT<br/> GTATGGTGGTTCTACCACCCTGCTGATTGTCACCGGTCTGGCTATGCAGTTTT<br/> TTCTGTTTGGTATGTGGGCTGCGCTGTATAACATACGCCGGAACCTGTATGG<br/> TACCGGTGCACGTGCTACCGGTAGTGGTTTTGCAAGCGCAATTGGTCGTGTT<br/> GGTAGCCTGATTGGTCCGTATGTTGTTGGTGTGTTCTGCCGTTTTTGGTCA<br/> GGGTGGTGTGTTACGCTGGGTGCTCTGAGTTTTGTTGCCGCGGCTATTGCG<br/> GTTTGGACGCTGGGTATTGAAACGAAAGGTCTGGCGCTGGAACAGCTGGCT<br/> GCTGGTGATGATGCAGGTGGTAATGGTCGCTATCCGGCAACCGCAGCTGAT<br/> AAAGCAAGTCTCGAG</p>                              |
| <b>Nampt</b> | <p>ATGGACAACCTGCTGAACTACTCTTCTCGTGCTTCTGCTATCCCGTCTCTGCT<br/> GTGCGACTTCTACAAAACCTCTACCGTATCATGTACCCGGAATGCTCTCAG<br/> ATCATCTACTCTACCTTCACCCCGCGTTCTAACGAACAGGCTCCGTACCTGA<br/> CCCAGGTTGTTTCTTTCGGTTTCCAGGCTTTCATCATCAAATACCTGATCCAC<br/> TACTTCAACGACAACCTTCTTCTCTCGTGACAAACACGACGTTGTTACCGAAT<br/> ACTCTGCTTTCATCGAAAAACCTGCAGCTGGAAGACACCGGTGAACACA<br/> TCGCTAAACTGCACGAACTGGGTTACCTGCCGATCCGTATCAAAGCTATCCC<br/> GGAAGGTAACCGTTGCTATCAAAGTTCCGGTTATGACCATCGAAAACAC<br/> CCTACTGACTTCTTCTGGCTGACCAACTACCTGGAAACCTGATCAACGTT<br/> TCTCTGTGGCAGCCGATGACCTCTGCTTCTATCGCTTTCGCTTACCGTACCGC<br/> TCTGATCAAATTCGCTAACGAAACCTGCGACAACCAGGAACACGTTCCGGTTC<br/> CAGTCTCACGACTTCTCTATGCGTGGTATGTCTTCTCTGGAATCTGCTGAAAC<br/> CTCTGGTGCTGGTCACCTGACCTCTTCTGGGTACCGACACCATCCCGGCTC<br/> TGCTTTTCGTTGAAGCTTACTACGGTCTTCTTCTCTGATCGGTACCTCTATC<br/> CCGGCTTCTGAACACTCTGTTATGTCTTCTCACGGTGTGACGAACTGTCTAC<br/> CTTCCGTTACCTGATGGCTAAATTCCCGCACAACATGCTGTCTATCGTTTCTG<br/> ACACCACCGACTTCTGGCACAACATCACCGTTAACCTGCCGCTGCTGAAACA<br/> GGAAATCATCGCTCGTCCGGAAACGCTCGTCTGGTATCCGTCCGGACTCT<br/> GGTAACTTCTTCGCTATCATCTGCGGTGACCCGACCGCTGACACCGAACACG<br/> AACGTAAAGGTCTGATCGAATGCCTGTGGGACATCTTCGGTGGTACCGTTAA<br/> CCAGAAAGGTTACAAAGTTATCAACCCGCACATCGGTGCTATCTACGGTGAC<br/> GGTGTACCTACGAAAAAATGTTCAAAATCCTGGAAGGTCTGCAGGCTAAA</p> |

|             |                                                                                                                                                                                                                                                                                                                                                                                                                                                                                                                                                                                                                                                                                                                                 |
|-------------|---------------------------------------------------------------------------------------------------------------------------------------------------------------------------------------------------------------------------------------------------------------------------------------------------------------------------------------------------------------------------------------------------------------------------------------------------------------------------------------------------------------------------------------------------------------------------------------------------------------------------------------------------------------------------------------------------------------------------------|
|             | GGTTTCGCTTCTTCTAACATCGTTTTTCGGTGTGGTGCTCAGACCTACCAGCG<br>TAACACCCGTGACACCCTGGGTTTTCGCTCTGAAAGCTACCTCTATCACCATC<br>AACGGTGAAGAAAAAGCTATCTTCAAAAACCCGAAAACCGACGACGGTTTC<br>AAAAAATCTCAGAAAGGTCGTGTTAAAGTTCTGTCTCGTGACACCTACGTTG<br>ACGGTCTGACCTCTGCTGACGACTTCTCTGACGACCTGCTGGAAGTCTGTT<br>CGAAGACGGTAAACTGCTGCGTCAGACCGACTTCGACGAAATCCGTCAGAA<br>CCTGCTGGTTTTCTCGTACCACCCTG                                                                                                                                                                                                                                                                                                                                                       |
| <b>PnuC</b> | ATGGTGCGTAGCCCTCTGTTTCTGCTGATTAGCTCAATTATTTGTATCCTGGT<br>TGGTTTTTATATCCGTAGCTCCTATATTGAAATCTTTGCCTCCGTTATGGGTA<br>TTATTAACGTTTGGCTGCTGGCACGTGAAAAAGTTTCTAACTTTCTGTTTGGT<br>ATGATCACTGTTGCGGTGTTTCTGTATATTTTTACCACCCAGGGTCTGTATGC<br>AATGGCTGTTCTGGCAGCATTTTCAGTTTATTTTAAATGTATATGGTTGGTATT<br>ATTGGATCGCACGTAGCGGCGAAGAAAAAGTTAAACCGACCGTTCGCCTGG<br>ATCTGAAAGGTTGGATTATTTATATTCTGTTTATCCTGGTCGCGTGGATTGGT<br>TGGGGTTATTATCAGGTTTCGCTATCTGGAAAGCACCAATCCGTATCTGGATG<br>CACTGAATGCAGTTCTGGGCCTGGTTGCACAGTTTATGCTGTCTCGTAAAT<br>TCTGGAAAAGTGGCATCTGTGGATTCTGTATAATATTGTTAGCATTGTGATCT<br>ATATCAGCACCGGTCTGTATGTTATGCTGGTTCTGGCGATTATTAATCTGTTT<br>CTGTGTATCGATGGTCTGCTGGAATGGAAAAAGAACCATAAAGAACGCGAA<br>CGTGTGAATAACTATATTCTCGAG |
